# Supplementary material
Source: Copernicus journal article supplement (doi:10.5194/acp-26-7765-2026)
Supplement: Supplementary file [file acp-26-7765-2026-supplement-title-page.pdf › acp-26-7765-2026-supplement-title-page.pdf]

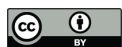

## *Supplement of*

# **Distinct dual-isotopic signatures of major methane sources in South Asia**

**Peng Yao et al.**

*Correspondence to:* Örjan Gustafsson ([orjan.gustafsson@aces.su.se](mailto:orjan.gustafsson@aces.su.se))

- [acp-26-7765-2026-supplement-title-page.pdf](#)
- [Supporting Information 20260520.pdf](#)
- [datas1\\_south\\_asia.xlsx](#)
- [datas2\\_global.xlsx](#)

The copyright of individual parts of the supplement might differ from the article licence.
